# Supplementary material for: Evaporation measurements using commercial microwave links as scintillometers
Source: Copernicus journal article supplement (doi:10.5194/egusphere-2025-1128), 2025-05-05
Supplement: Supplementary file 1 [file egusphere-2025-1128-supplement.pdf]

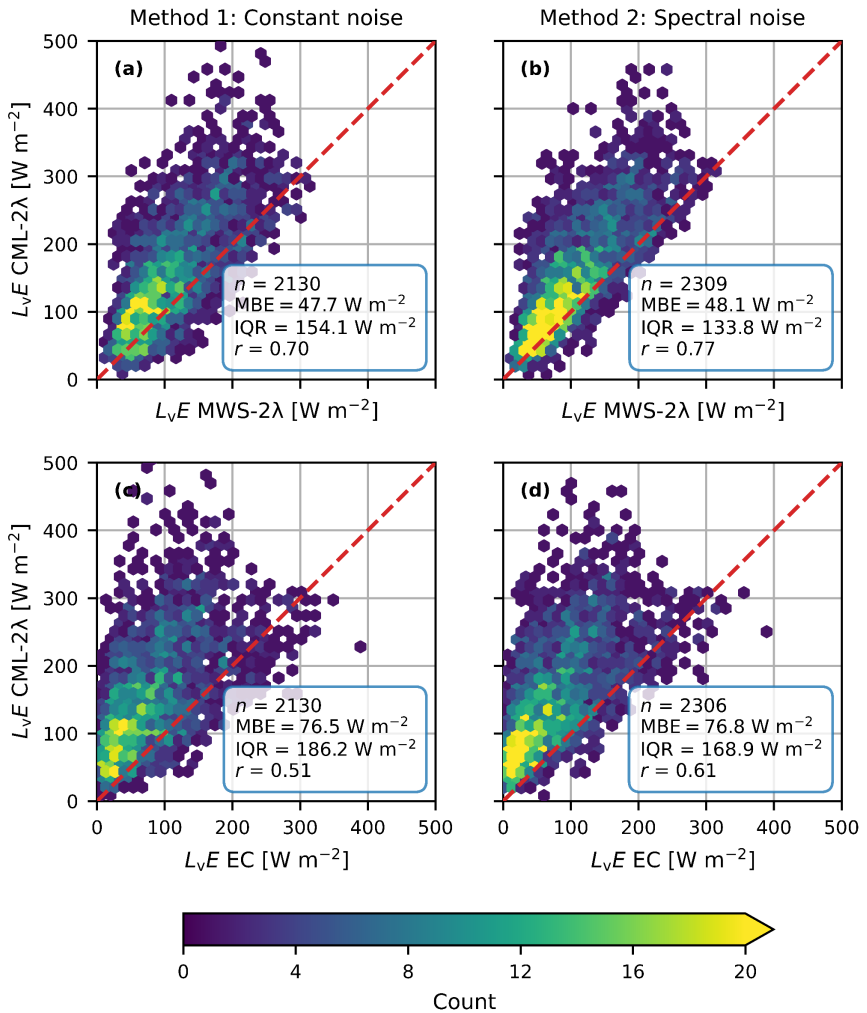

**Fig S1.** 30-min  $L_v E$  estimates obtained with the Nokia CML using the two-wavelength method together with the complete scaling for the entire study period, post-processed with the constant noise correction method (a and c) and spectral noise correction method (b and d) versus the MWS-LAS (a and b) and the EC (c and d) estimates. The dashed red line is the 1:1 line.

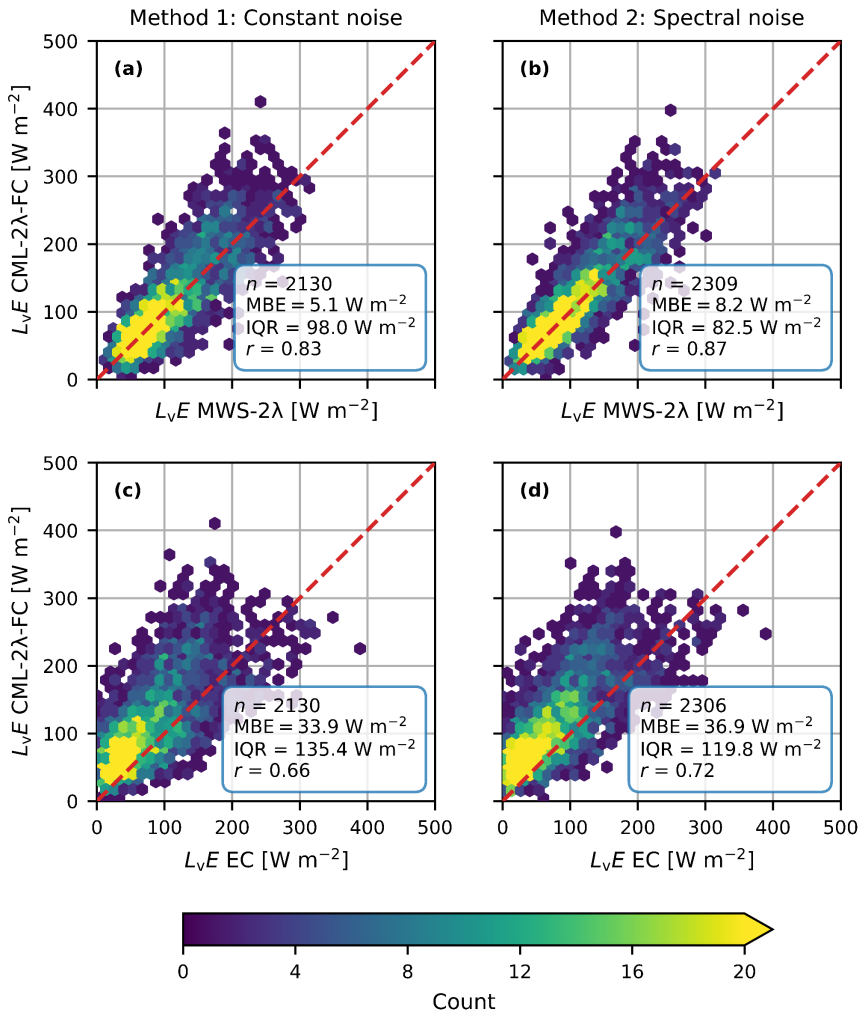

**Fig S2.** 30-min  $L_v E$  estimates obtained with the Nokia CML using the two-wavelength method together with the free-convection scaling for the entire study period, post-processed with the constant noise correction method (a and c) and spectral noise correction method (b and d) versus the MWS-LAS (a and b) and the EC (c and d) estimates. The dashed red line is the 1:1 line.

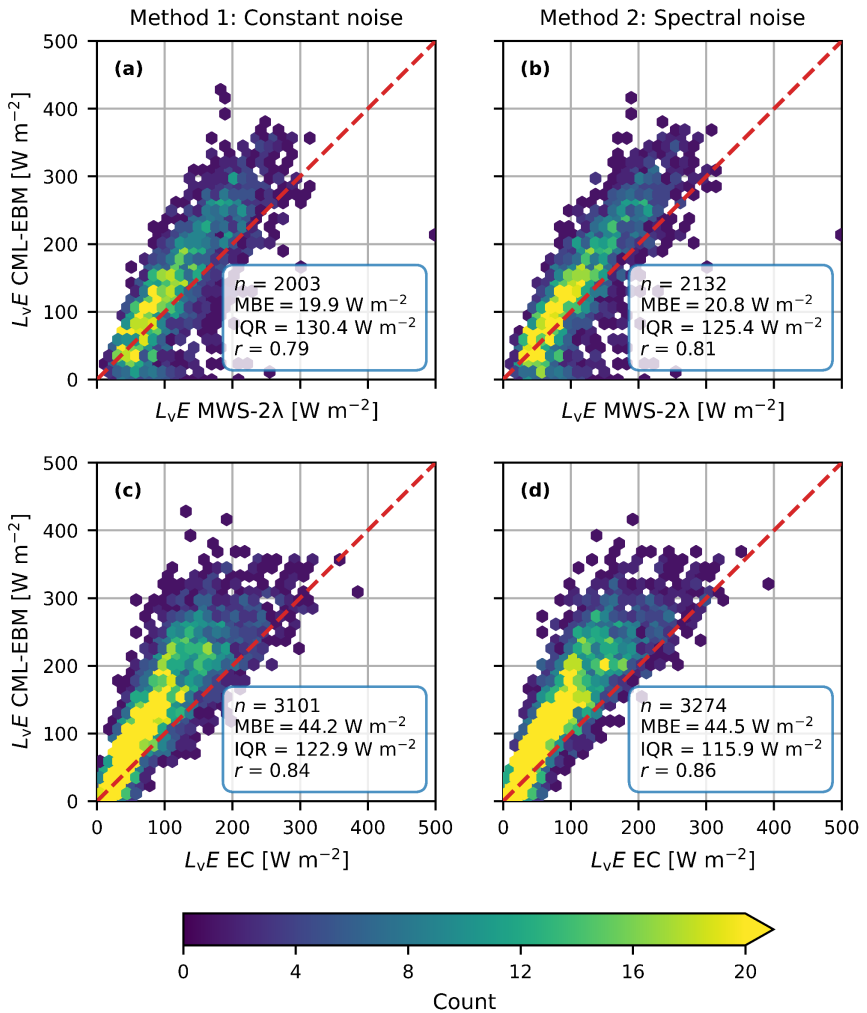

**Fig S3.** 30-min  $L_v E$  estimates obtained with the Nokia CML using the energy-balance method together with the complete scaling for the entire study period, post-processed with the constant noise correction method (a and c) and spectral noise correction method (b and d) versus the MWS-LAS (a and b) and the EC (c and d) estimates. The dashed red line is the 1:1 line.

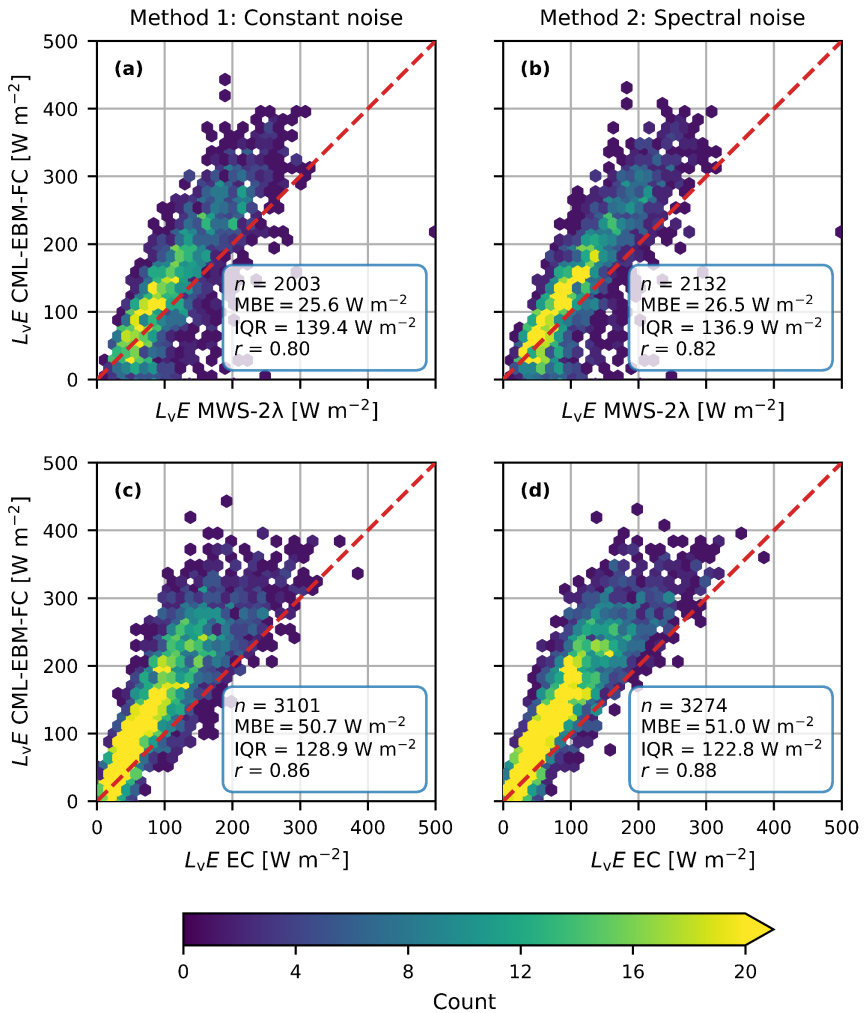

**Fig S4.** 30-min  $L_vE$  estimates obtained with the Nokia CML using the energy-balance method together with the free-convection scaling for the entire study period, post-processed with the constant noise correction method (a and c) and spectral noise correction method (b and d) versus the MWS-LAS (a and b) and the EC (c and d) estimates. The dashed red line is the 1:1 line.



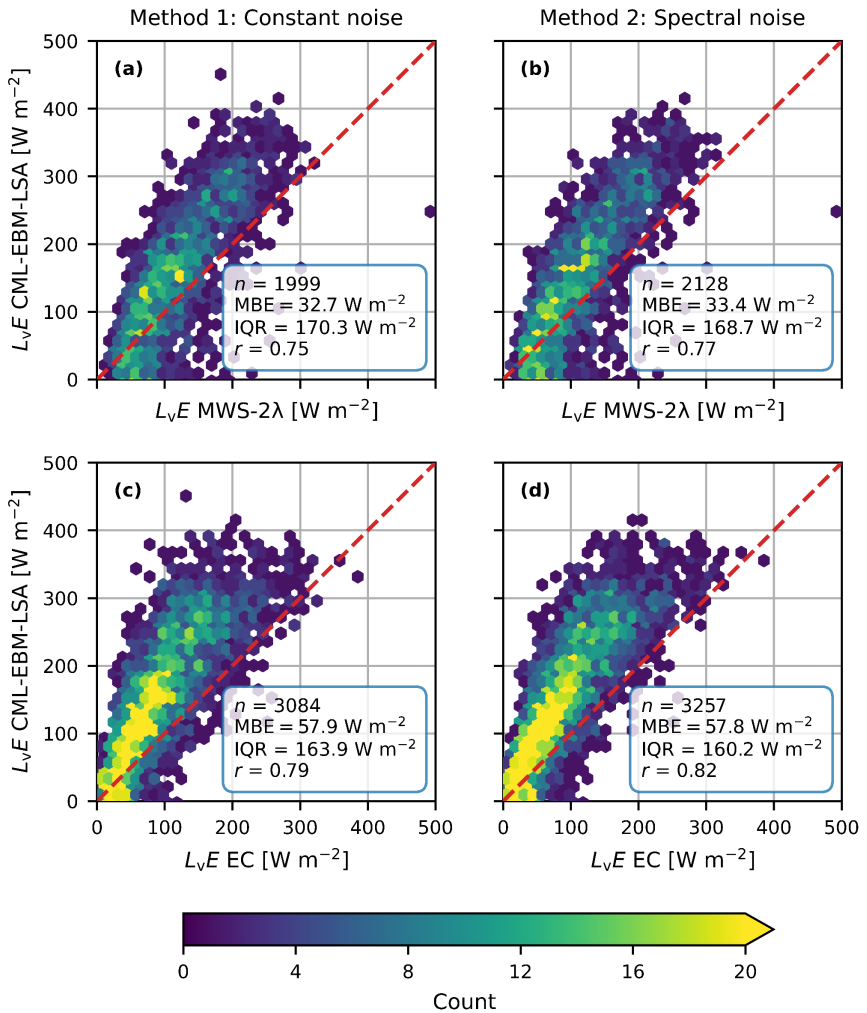

**Fig S5.** 30-min  $L_v E$  estimates obtained with the Nokia CML using the energy-balance method based on LSA SAF radiation estimates together with the complete scaling for the entire study period, post-processed with the constant noise correction method (a and c) and spectral noise correction method (b and d) versus the MWS-LAS (a and b) and the EC (c and d) estimates. The dashed red line is the 1:1 line.

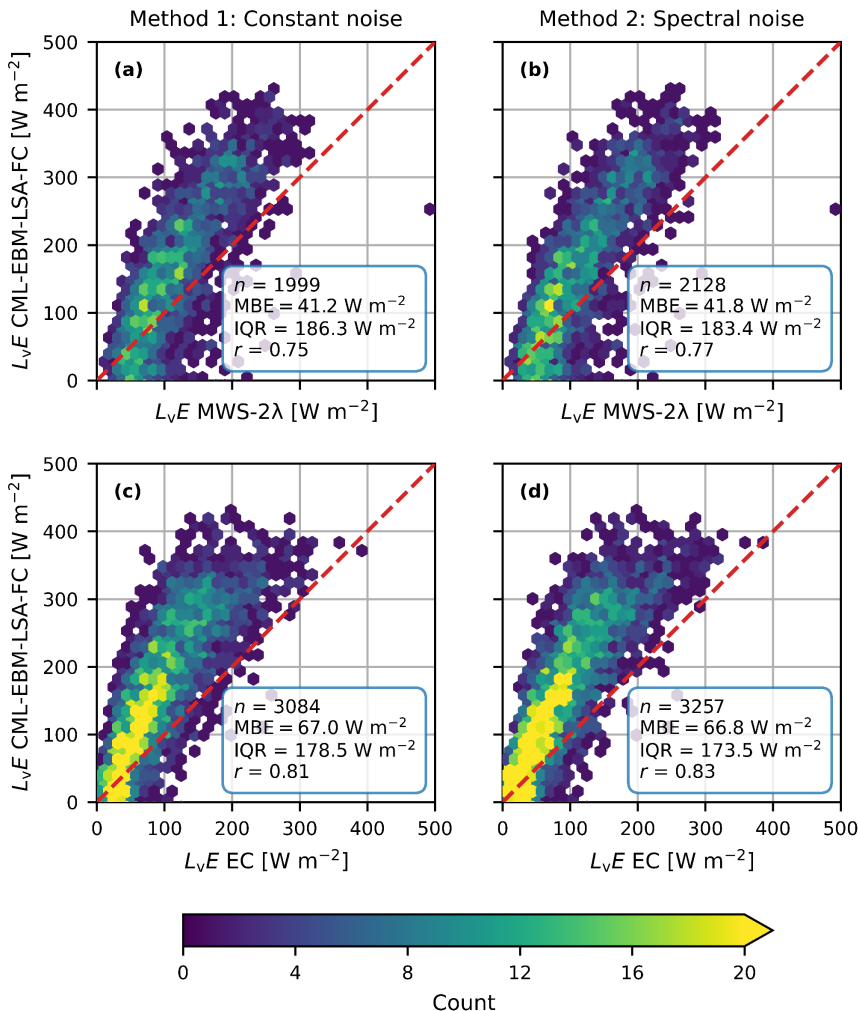

**Fig S6.** 30-min  $L_V E$  estimates obtained with the Nokia CML using the energy-balance method based on LSA SAF radiation estimates together with the free-convection scaling for the entire study period, post-processed with the constant noise correction method (a and c) and spectral noise correction method (b and d) versus the MWS-LAS (a and b) and the EC (c and d) estimates. The dashed red line is the 1:1 line.

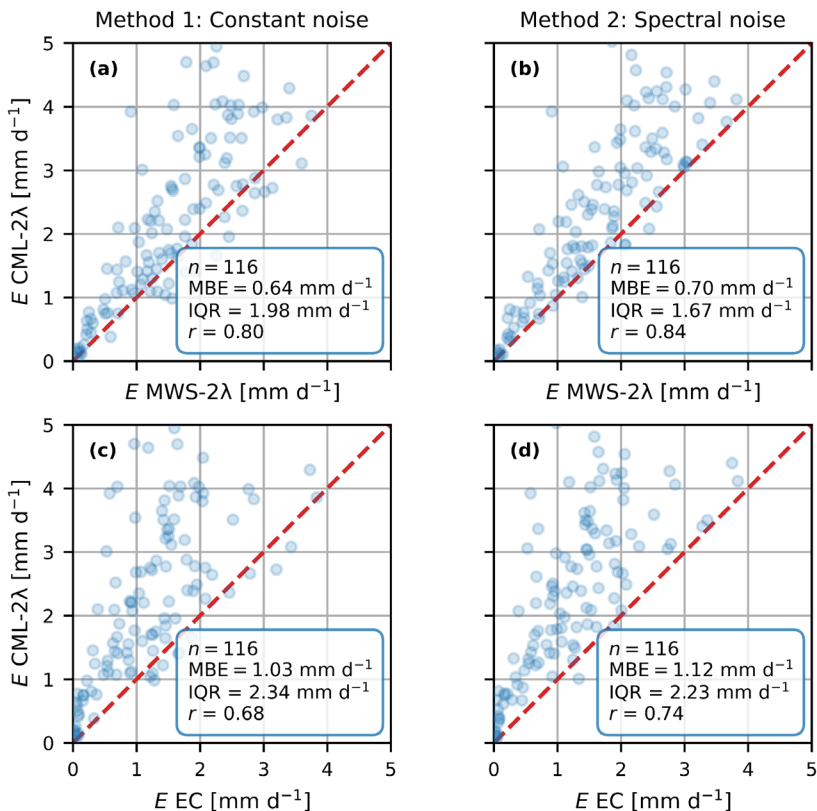

**Fig S7.** Daily  $E$  estimates obtained with the Nokia CML using the two-wavelength method together with the complete scaling for the entire study period, post-processed with the constant noise correction method (a and c) and spectral noise correction method (b and d) versus the MWS-LAS (a and b) and the EC (c and d) estimates. The dashed red line is the 1:1 line.

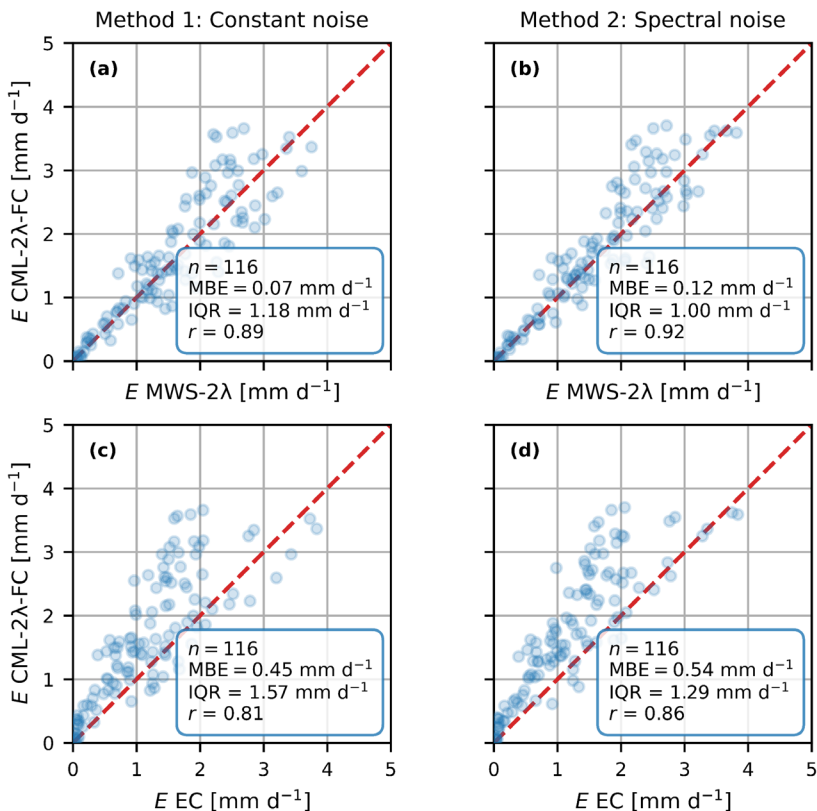

**Fig S8.** Daily  $E$  estimates obtained with the Nokia CML using the two-wavelength method together with the free-convection scaling for the entire study period, post-processed with the constant noise correction method (a and c) and spectral noise correction method (b and d) versus the MWS-LAS (a and b) and the EC (c and d) estimates. The dashed red line is the 1:1 line.

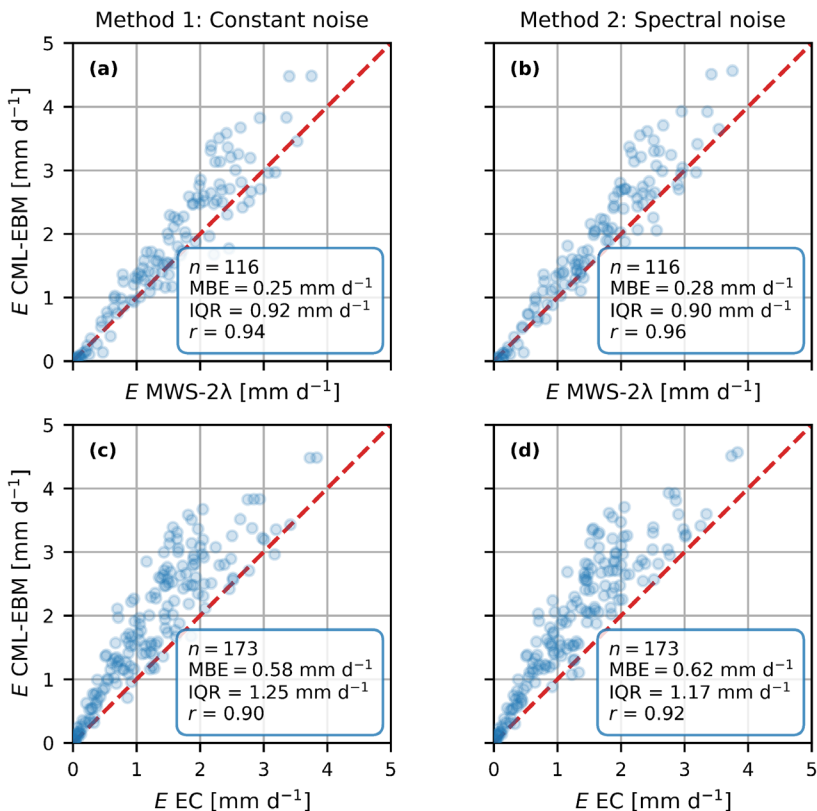

**Fig S9.** Daily  $E$  estimates obtained with the Nokia CML using the energy-balance method together with the complete scaling for the entire study period, post-processed with the constant noise correction method (a and c) and spectral noise correction method (b and d) versus the MWS-LAS (a and b) and the EC (c and d) estimates. The dashed red line is the 1:1 line.

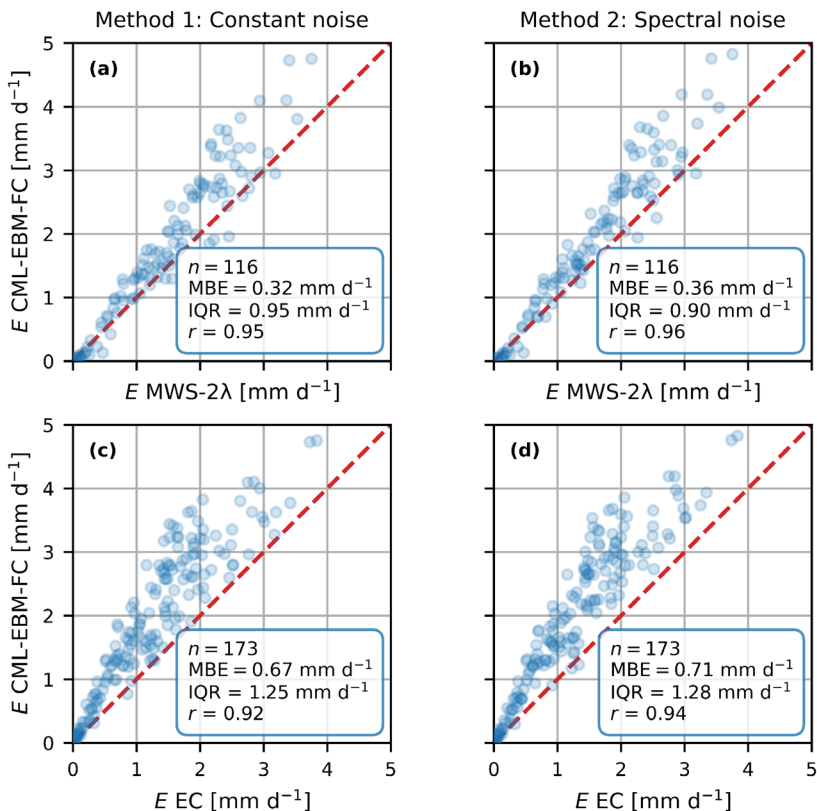

**Fig S10.** Daily  $E$  estimates obtained with the Nokia CML using the energy-balance method together with the free-convection scaling for the entire study period, post-processed with the constant noise correction method (a and c) and spectral noise correction method (b and d) versus the MWS-LAS (a and b) and the EC (c and d) estimates. The dashed red line is the 1:1 line.

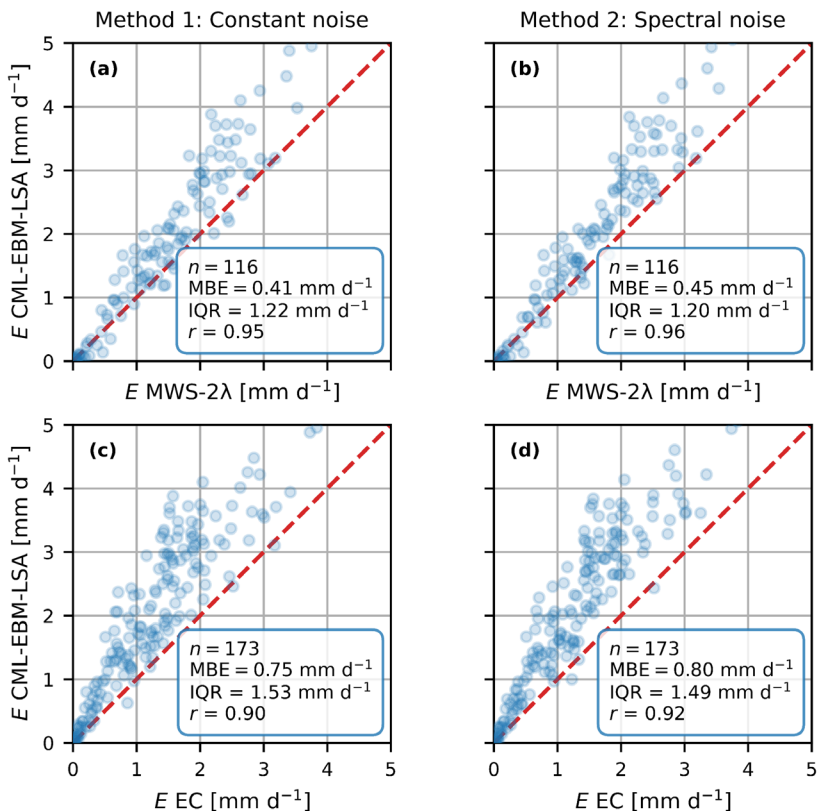

**Fig S11.** Daily  $E$  estimates obtained with the Nokia CML using the energy-balance method based on LSA SAF radiation estimates together with the complete scaling for the entire study period, post-processed with the constant noise correction method (a and c) and spectral noise correction method (b and d) versus the MWS-LAS (a and b) and the EC (c and d) estimates. The dashed red line is the 1:1 line.

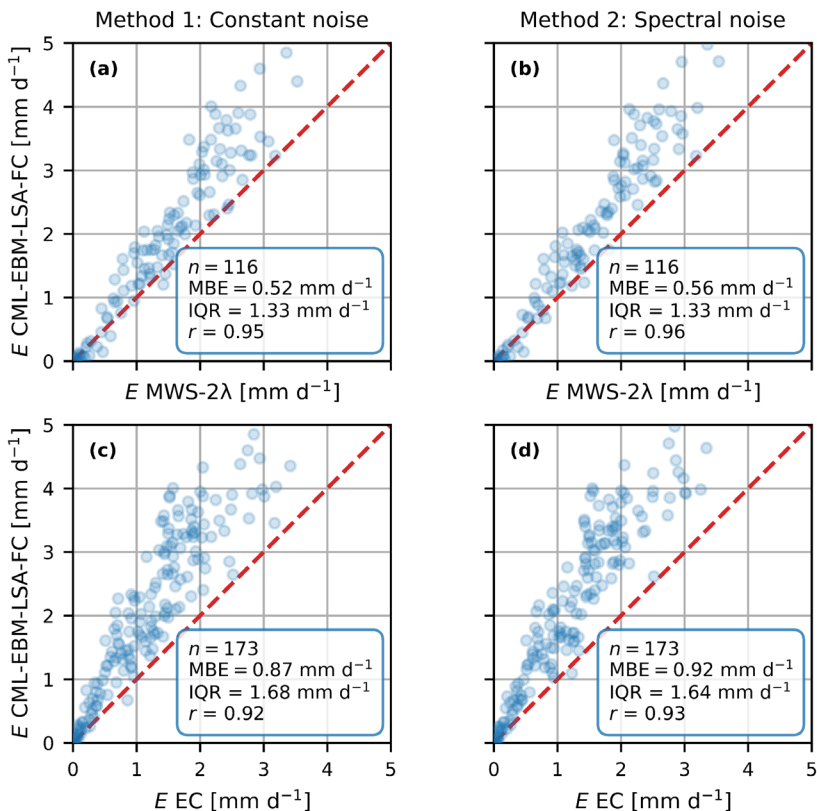

**Fig S12.** Daily  $E$  estimates obtained with the Nokia CML using the energy-balance method based on LSA SAF radiation estimates together with the free-convection scaling for the entire study period, post-processed with the constant noise correction method (a and c) and spectral noise correction method (b and d) versus the MWS-LAS (a and b) and the EC (c and d) estimates. The dashed red line is the 1:1 line.



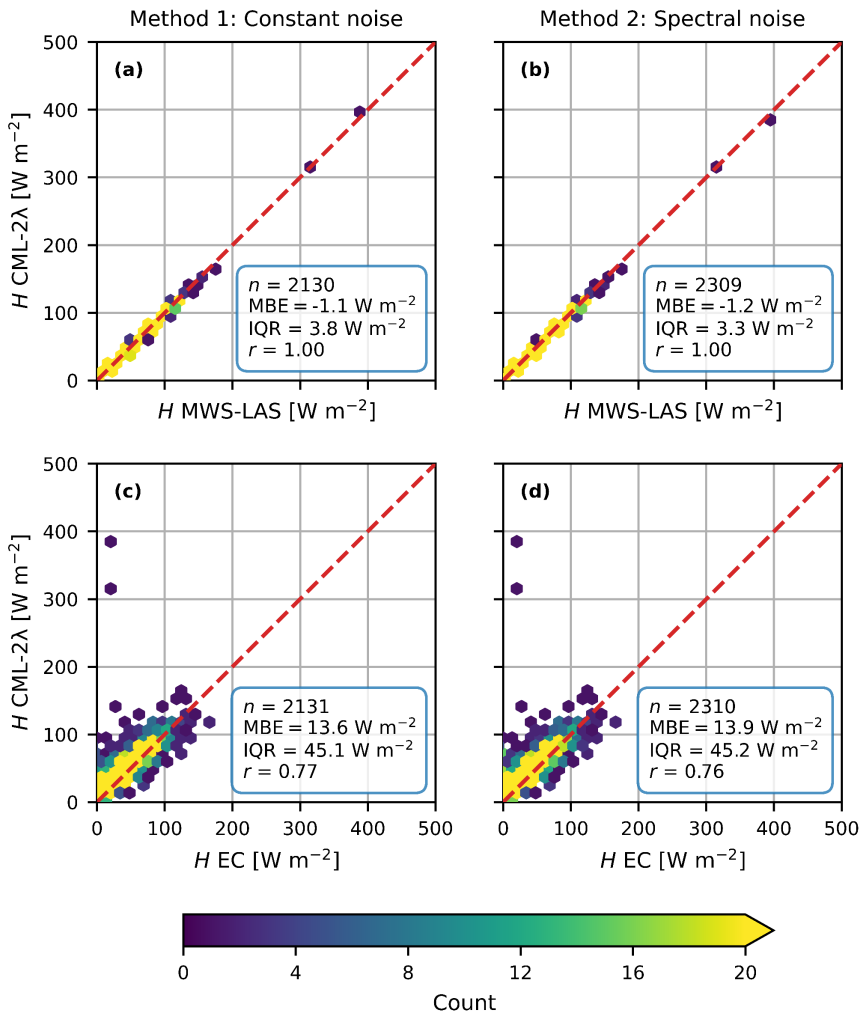

**Fig S13.** 30-min  $H$  estimates obtained with the Nokia CML using the two-wavelength method together with the complete scaling for the entire study period, post-processed with the constant noise correction method (a and c) and spectral noise correction method (b and d) versus the MWS-LAS (a and b) and the EC (c and d) estimates. The dashed red line is the 1:1 line.

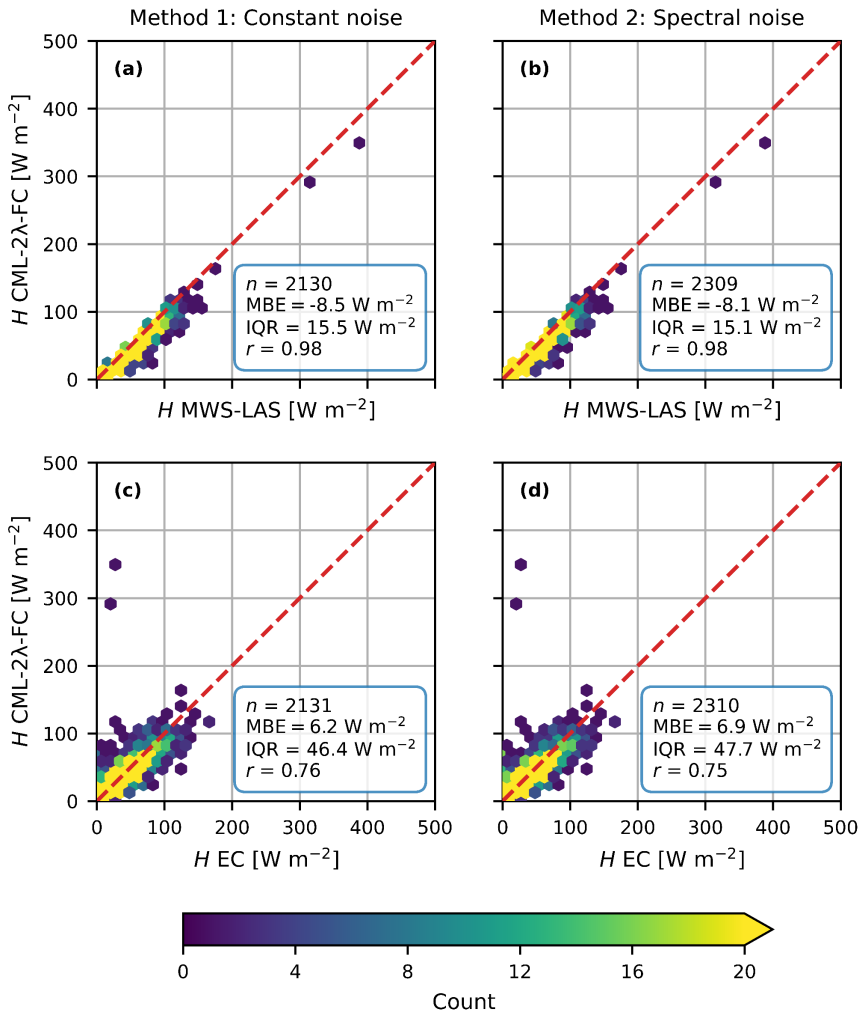

**Fig S14.** 30-min  $H$  estimates obtained with the Nokia CML using the two-wavelength method together with the free-convection scaling for the entire study period, post-processed with the constant noise correction method (a and c) and spectral noise correction method (b and d) versus the MWS-LAS (a and b) and the EC (c and d) estimates. The dashed red line is the 1:1 line.

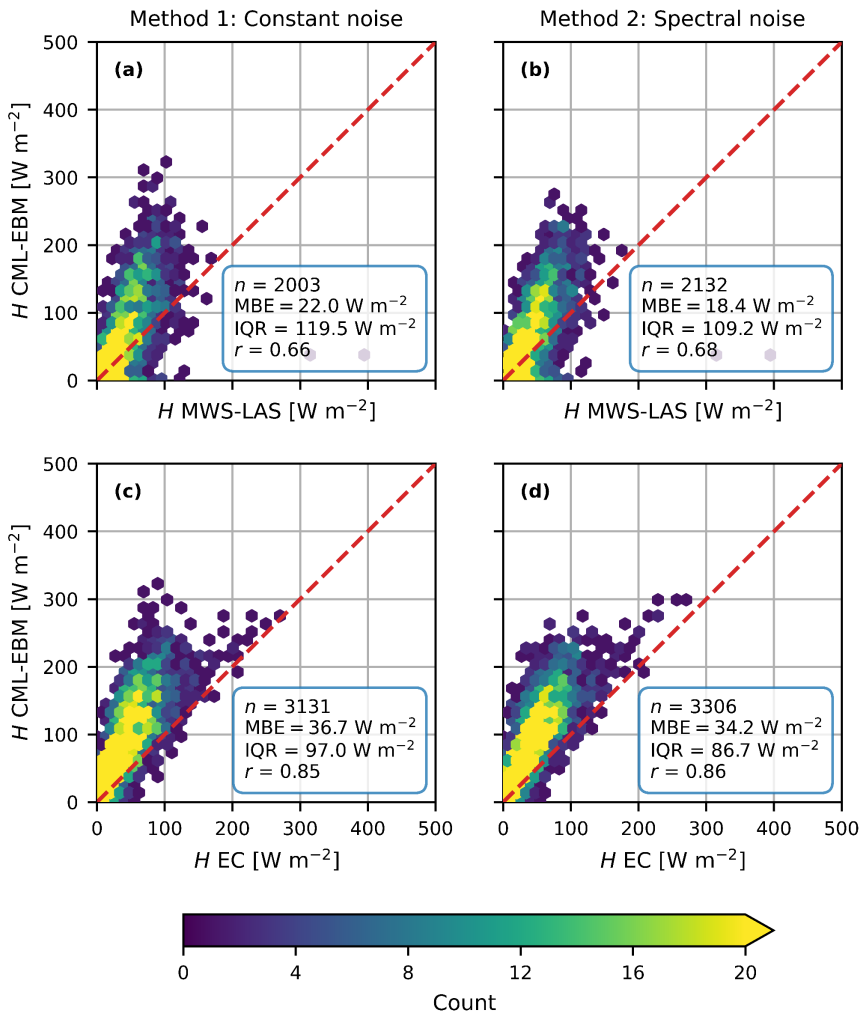

**Fig S15.** 30-min  $H$  estimates obtained with the Nokia CML using the energy-balance method together with the complete scaling for the entire study period, post-processed with the constant noise correction method (a and c) and spectral noise correction method (b and d) versus the MWS-LAS (a and b) and the EC (c and d) estimates. The dashed red line is the 1:1 line.

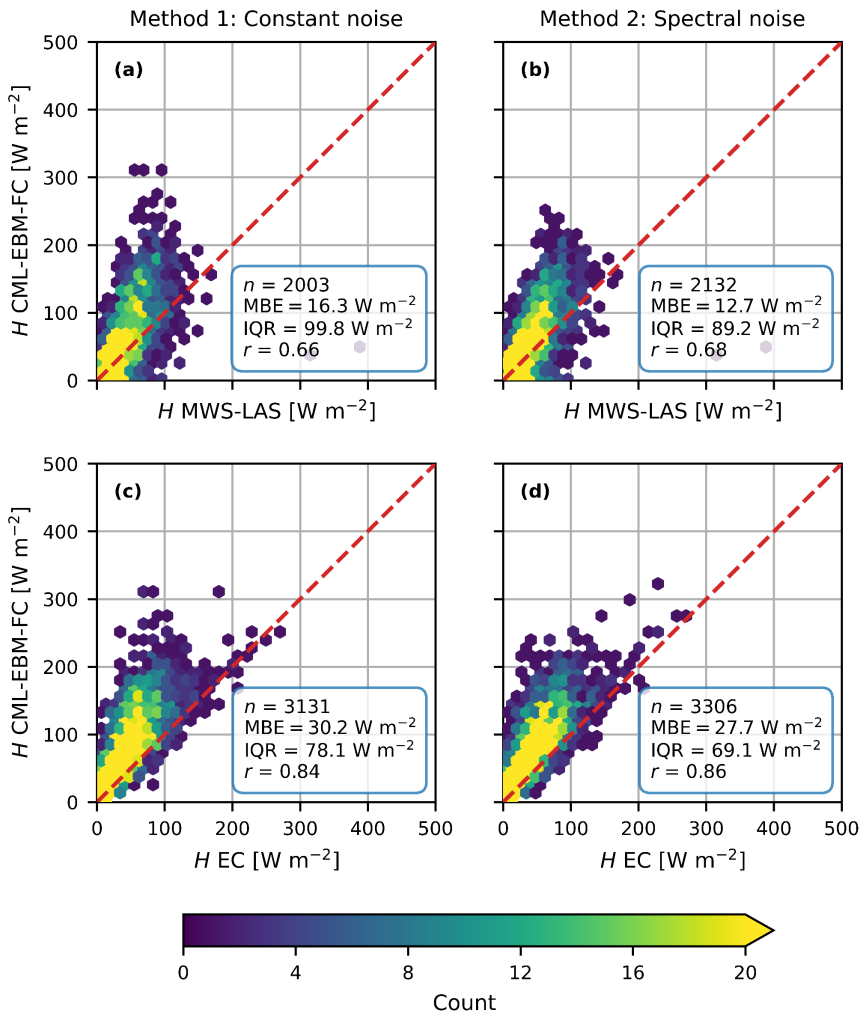

**Fig S16.** 30-min  $H$  estimates obtained with the Nokia CML using the energy-balance method together with the free-convection scaling for the entire study period, post-processed with the constant noise correction method (a and c) and spectral noise correction method (b and d) versus the MWS-LAS (a and b) and the EC (c and d) estimates. The dashed red line is the 1:1 line.

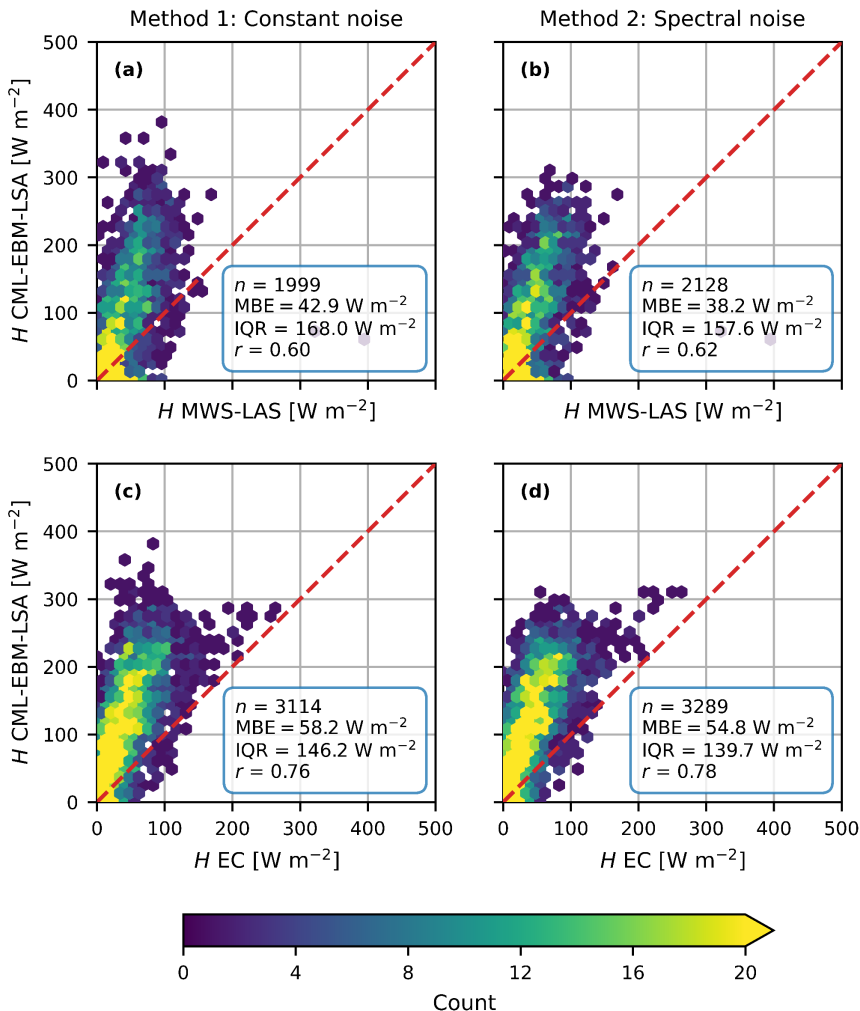

**Fig S17.** 30-min  $H$  estimates obtained with the Nokia CML using the energy-balance method based on LSA SAF radiation estimates together with the complete scaling for the entire study period, post-processed with the constant noise correction method (a and c) and spectral noise correction method (b and d) versus the MWS-LAS (a and b) and the EC (c and d) estimates. The dashed red line is the 1:1 line.

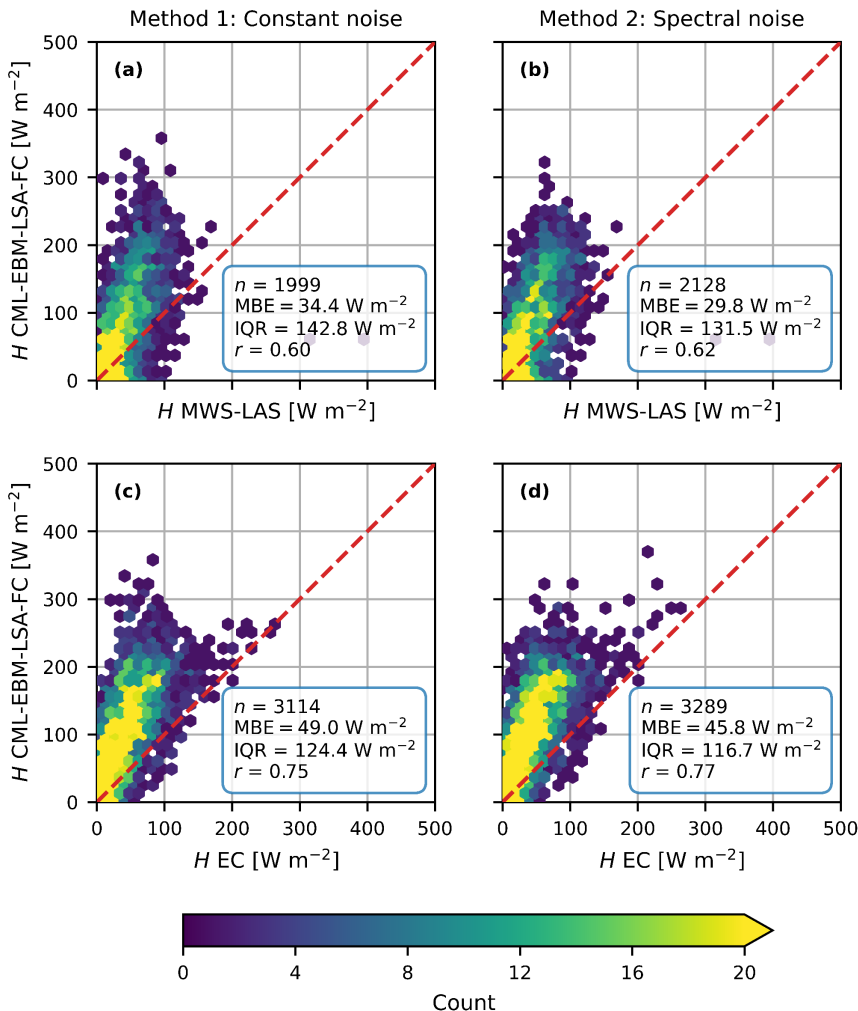

**Fig S18.** 30-min  $H$  estimates obtained with the Nokia CML using the energy-balance method based on LSA SAF radiation estimates together with the free-convection scaling for the entire study period, post-processed with the constant noise correction method (a and c) and spectral noise correction method (b and d) versus the MWS-LAS (a and b) and the EC (c and d) estimates. The dashed red line is the 1:1 line.

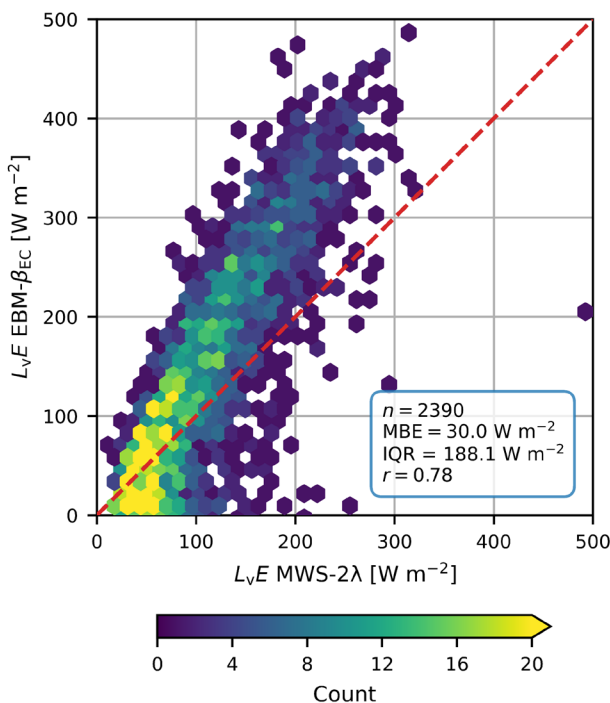

**Fig S19.** 30-min  $L_v E$  estimates obtained using measured available energy ( $R_{\text{net}} - G$ ) and the Bowen ratio obtained from the EC, i.e.,  $(R_{\text{net}} - G)/(1 + \beta)$ , versus the MWS-2 $\lambda$  used for Fig. 6. The used Bowen ratio is the median ratio for the full data period (excluding nighttime intervals). The dashed red line is the 1:1 line.

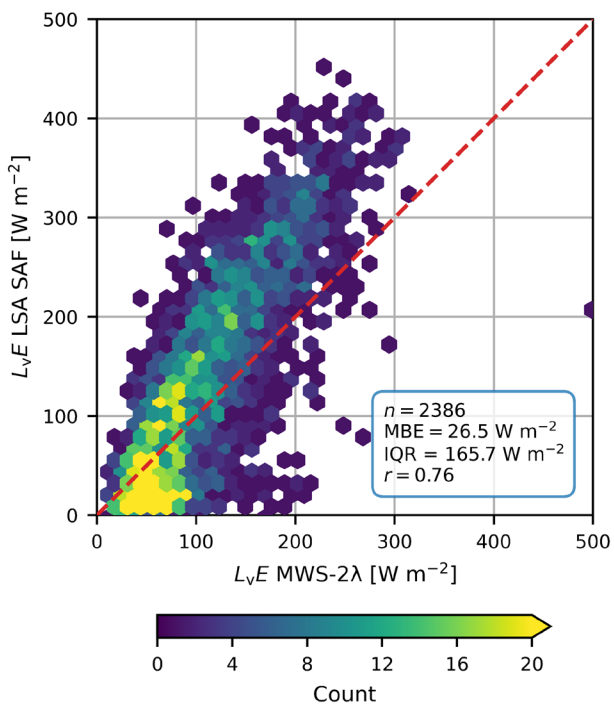

**Fig S20.** 30-min  $L_vE$  estimates directly obtained from LSA SAF versus the MWS-2 $\lambda$  used for Fig. 6. The dashed red line is the 1:1 line.
