# Supplementary material for: Evaporation measurements using commercial microwave links as scintillometers
Source: Copernicus journal article supplement (doi:10.5194/egusphere-2025-1128), 2025-05-05
Supplement: Supplementary file [file egusphere-2025-1128-AC3-supplement.pdf]

Dear Referee,

Thank you for your time to review our manuscript and for all your constructive suggestions considering our study. It helped to improve the quality of the manuscript. We reply to your comments below. Our response to the comments appears in bold and revised text as *italic*.

- Line 26: “Bastiaanssen et.al. 1998, Mu et.al., 2007” more recent references, as well as overview papers, could have been used here to illustrate the point the authors make.  
**The references used here are two algorithms to determine evaporation, which is currently not clear. We remove these references and replace with a more appropriate review:**  
*In comparison, satellite remote sensing **estimates of evaporation** have a better spatial coverage, but have a low temporal and limited spatial resolution (Zhang et al., 2016).*
- Line 52: “so that the Cnn values are overestimated”; better to replace this with: “resulting in an overestimation of Cnn values”.  
**We changed accordingly.**
- Lines 54-57: Please split up this sentence to make it more clear.  
**We changed as follows:**  
*In order to correct for that, we proposed two **methods**. **The first method** applies a high-pass filter and subtracts a low quantile of the resulting variances of the Nokia CML, called the constant noise correction method. **The second method** corrects for the noise in the Nokia CML by comparing with an MWS and selecting parts of the power spectra where the Nokia Flexihopper behaves in correspondence with scintillation theory, called the spectral noise correction method. The latter method also considers different crosswind conditions and corrects for the omitted scintillations using scintillation theory.*
- Line 91: “to be 0.8”; maybe add that this is for daytime conditions.  
**We added as follows:**  
*Similar to Ward et al. (2015b), we assume  $r_{Tq}$  to be 0.8 **for daytime conditions**, who find this to be a reasonable value, consistent with values obtained from fast-response sensors (e.g., Kolsiek, 1982; Meijninger et al., 2002).*
- Line 127: “To do so, closure of the measured energy balance is assumed” It might be good to mention at this point that closure of the energy balance is almost never accomplished, especially not in “complex measurement environments (e.g. forests or cities)”.  
**We agree with the reviewer and rephrased as follows (also based on other reviewer’s comments):**  
*...is used for the ground heat flux. **Note that the measured energy balance hardly ever closes, especially in more complex measurement environments, e.g., forests or cities (Mauder et al., 2020). For the field site used in this study, Cabauw in the Netherlands, typically an imbalance during day-time is found between 10% (afternoons) to 40% (mornings) (Kroon, 2004). For our data period we find similar values using EC data (not shown).***  
  
***As alternative constraint**, we considered prescribing a Bowen ratio instead of net radiation, however that did not yield promising results...*

- Line 162: “from 1 April 2024 to 1 October 2024”; please mention that only daytime data is used.  
**We followed the suggestion of the reviewer:**  
*We use **daytime** data from from 1 April 2024 to 1 October 2024, which corresponds to a growing season in the Netherlands.*
- Lines 164-165: “The footprints ... included.” It might be considered to show the typical footprint in Figure 2 to illustrate this statement.  
**The dominant wind direction at Cabauw is south-westerly, for which the footprint is almost homogeneous grass fields with small ditches in between. To emphasize that in most cases the footprints are homogeneous, we rephrased as follows:**  
*The dominant wind direction at Cabauw is south-westerly, so that the footprints of the scintillometers and EC mostly consist of grass fields. Only for northerly wind directions built-up area may partly be included.*
- Line 169: Replace “we show” by “it is shown”, since the authors are not (exactly) the same.  
**We followed the suggestion of the reviewer.**
- Line 171: add “a” between “is” and “more”.  
**We followed the suggestion of the reviewer.**
- Lines 184-186: “In order ... time intervals”. Please rephrase this to make clear what exactly has been done here.  
**We rephrased as follows:**  
*In order to be able to compare daily E estimates, we only aggregate the 30-min time intervals per day that are available for both the Nokia CML and the reference instrument.*
- Line 206: “comparable”; unclear to what; please add clarification.  
**This is indeed unclear. We refer here to the statistical metrics from our comparison of LSA SAF estimates with measured net radiation for our data period. We rephrased as follows:**  
*For Cabauw during our data period, the net radiation obtained with LSA SAF compared to the measured net radiation on average shows similar error estimates, though with an overestimation (Fig. A1).*
- Line 222: “the expected differences”; please explain what these expected differences are.  
**We mean here the higher  $L_vE$  values for the sunny day than for the cloudy day. We rephrased as follows:**  
*Moreover, the  $L_vE$  estimates on the sunny day are higher than on the cloudy day for all methods, as would be expected.*
- Lines 231: “In this...versus the MWS-2 $\lambda$ .” Please use shorter sentence to make this more clear.  
**We changed as follows:**  
*...In this plot, we also show the intercomparison between the reference methods and two comparisons with alternative methods to derive  $L_vE$ . These alternatives are the  $L_vE$  estimates obtained directly from LSA SAF versus those from the MWS-2 $\lambda$  method and  $L_vE$  estimates based on  $R_{net} - G$  and a Bowen ratio versus those from the MWS-2 $\lambda$  method. We show these*

*methods to illustrate how a readily available (former) and a basic experimental method from only net radiation estimates (latter) perform in comparison to the reference instruments. The used Bowen ratio in the latter method is obtained from the EC and is the median ratio for the full data period (excluding nighttime intervals). We use a median value as a means to obtain an objectively selected, representative Bowen ratio value to estimate L<sub>v</sub>E from only net radiation measurements.*

- Lines 233-234: “This Bowen ... intervals).” Please explain/justify why this was done (instead of using the actual Bowen ratio).  
**See our response to your previous comment.**
- Line 237-238, figure 5, caption: remove “together”  
**We changed accordingly.**
- Line 237-238, figure 6, caption “The used Bowen ....intervals).” Please explain why this constant ratio is used instead of the (more appropriate?) instantaneous/daily value.  
**We added as follows (also in the other figures):**  
*The used Bowen ratio is a median value for the full data period (excluding nighttime intervals), as a means to obtain an objectively selected, representative Bowen ratio value to estimate L<sub>v</sub>E from only net radiation measurements. We refer the reader to Appendix A for a complete overview of the used abbreviations.*  
**Also see our changed text in our to your comment on L231.**
- Line 238 and further; please use the same abbreviation throughout the paper (for example not EBM without addition versus later on EBM-LSA and/or EBM-β<sub>EC</sub>). Maybe a good idea would be to add an abbreviation list at the start/end of the paper for more easy reference.  
**The EBM used here is the energy balance method making use of the measured net radiation. We realise that this can be unclear. Therefore, we change EBM with observations to EBM-OBS. Moreover, in Sect. 2, we also added for the EBMs a clarification per method on their abbreviation at the end of that specific subsection. Lastly, we also added an abbreviation list in the appendix. We think that this will help the reader more easily understand the structure of the abbreviations.**  
**So the end of Sect. 2.2 becomes:**  
*...of the prescribed Bowen ratio. In the remainder of this article, we refer to the EBM using in-situ radiation data with EBM-OBS, and for the method using the LSA data products, we use EBM-LSA.*  
**To refer the reader to the abbreviation list, we added in the theory section, experiment section and in the captions:**  
*We refer the reader to Appendix A for a complete overview of the used abbreviations.*
- Line 241: add “it” between “but” and “has”.  
**We changed accordingly.**
- Lines 243-245. This sentence is insufficient explanation at this point. Only mentioning the Van der Valk 2025 paper is not enough; one or two additional explanatory lines would be required here.

We refer here to the differences in the performance of the turbulent heat fluxes and refer to van der Valk et al. (2025), to guide the reader to the overestimation of  $C_{nn}$  (and not specifically to the correction methods). In the sentence following these lines, we explain what causes this behaviour. To clarify, we rephrased as follows:

*...two turbulent heat fluxes at Cabauw. These differences in performance between the turbulent heat fluxes are mostly a consequence of the nature of these methods in combination with the overestimation of  $C_{nn}$  by the CML (see van der Valk et al., 2025).*

- Line 246-248. “If desired... and H.” Doing so would be rather arbitrary and considered finetuning, which is not a good approach to solve this particular phenomenon.

**We agree with the reviewer. We removed this part, as it does not fit in this context.**

- Line 256: “two alternative methods”; unclear what is meant with these two alternative methods. Please explain.

**We explain these two methods in the following sentences. To emphasize this, we change here as follows:**

*A comparison with two alternative methods to retrieve  $L_vE$  estimates shows that estimating  $L_vE$  using CMLs can be beneficial, especially regarding the spread. One of these alternative methods is based on the measured energy balance and prescribing a median Bowen ratio based on the EC data, i.e., the best possible estimation of the Bowen ratio, results in higher IQR in comparison to the MWS-2 $\lambda$  than any of the methods using the CML. The other alternative is the  $L_vE$  estimates directly obtained from LSA SAF data product. A comparison between these LSA SAF  $L_vE$  estimates versus the MWS-2 $\lambda$  is also outperformed on the IQR by the majority of the methods using the CML. In comparison to this method, it should be noted that the EBM using LSA SAF radiation data only shows a minor improvement.*

- Line 259: “between between”; remove one of these.

**Agreed.**

- Line 259: “estimates directly obtained from LSA SAF”; unclear what is meant here. Please explain.

**We mean the  $L_vE$  estimates that can be obtained from LSA SAF data product. See our reply to your comment on L256 on our addition.**

- Lines 218-261: In this section too many methods are intercompared to each other, where the assessment is based on three different parameters (MBE, IQR, r). Apart from the fact that it is difficult to read a piece of text with numerous abbreviations also the comparison is described by means of jumping between approaches and also between assessment parameters. This needs to be described in a much more systematic manner. It is advised to use consistent acronyms, split the section into subsections where performance versus the reference method's (only) are described w.r.t. MBE, IQR and r. Preferably only one reference method (which is the EC observation) should be used.

**We understand the comment of the reviewer, also in line with the comments of the other reviewers. In the results section, we added the following subsections to guide the reader:**

*4.1.1 Energy-balance method versus two-wavelength method, 4.1.2  $C_{nn}$  Correction methods, 4.1.3 Free Convection scaling, 4.1.4 Comparison with alternative  $L_vE$  methods*

Moreover, we changed the EBM with observations to EBM-OBS, which we think is an intuitive abbreviation.

Lastly, we changed the structure and sentences of (now) section 4.1.1, so that the comparison between the two-wavelength method and EBM-OBS is emphasized, and the EBM-LSA is only mentioned at the end of this section:

*Overall, the EBM-OBS outperforms the other two methods for the  $L_vE$  estimates. It has a lower MBE and IQR than the two-wavelength method and the EBM-LSA. All methods have a comparable  $r$  in comparison to the MWS- $2\lambda$ . We would have expected the two-wavelength method to perform best, as this is closest to the traditional two-wavelength setup, but it has a higher MBE **than** both the EBM versions. The  $H$  estimates of both EBM versions perform less well than the estimates of the two-wavelength method, as was also expected because the LAS signal dominates these estimates. (Fig. B1). The  $H$  estimates of EBM-OBS have an MBE and IQR **similar to** the  $L_vE$  estimates, even though  $L_vE$  is the highest of the two turbulent heat fluxes at Cabauw. These differences in performance between the turbulent heat fluxes are mostly a consequence of the nature of these methods in combination with the overestimation of  $C_{nn}$  by the CML (see van der Valk et al., 2025). For the two-wavelength method, this overestimation is fully attributed to the  $L_vE$ , since  $H$  is constrained by the LAS, while for the EBM methods this overestimation can be distributed among  $L_vE$  and  $H$ . **Note that the EBM-LSA has a higher MBE and IQR than the EBM-OBS, most likely due to the overestimation and uncertainty of  $R_{net}$  by LSA SAF (Fig. A1).***

Lastly, we disagree with the reviewer that only the EC observations should be used as reference. Scintillometers have proven their value over the past years during dedicated field campaigns. Moreover, the MWS-LAS setup measures along the same path as the CML, so that this reference is most representative of the turbulent flux estimates.

- Lines 277-278: “the performance...is roughly comparable”: This is an incorrect statement. The  $r$  are lower in all four cases and the MBE and IQR are up to a factor 2.6 higher!  
**We agree that this is not correctly phrased. We meant here that when using the two-wavelength method, the performance of the  $L_vE$  estimates for the spectral noise method and free-convection scaling is roughly comparable to the references. We should have also indicated that this is not the case for the complete scaling. We rephrase as follows:**  
*When using the two-wavelength method **with the spectral noise method and free-convection scaling**, the performance of the  $L_vE$  estimates is roughly comparable to the intercomparison between our reference instruments, the MWS- $2\lambda$  and EC systems. **Using the complete scaling instead, the performance of the  $L_vE$  estimates unexpectedly decreases, due to the overestimation of  $C_{nn}$  after correction (van der Valk et al., 2025).***
- Line 282: Add “an” before “CML”  
**We changed accordingly.**
- Lines 282-289: This section is mainly a repetition of what is described already in section 4.  
**We agree with the reviewer that this is a repetition of what is described in Section 4; however, we want to emphasize this as we think this is one of the more important results. It illustrates that there is potential in using an EBM, although this depends largely on the quality of the net radiation estimates. Therefore, we leave this as is.**

- Lines 293-294: “This underlines ...the MBE” This statement is correctly mentioning that the method is suffering from an in-accurate product ( $R_n$ ) that provides the upper limit of the turbulent fluxes. Because of this, a discussion on the accuracy of the relative contribution of  $H$  and  $LE$  to  $R_n$  would be more beneficial here. This would also better fit the topic of the paper, namely determination of turbulent  $LE$  flux.

**Based on your comment here, line 127, lines 349-356, and other reviewer’s comments, we have added a paragraph discussing the energy-balance closure in this Sect. 5.1 and elaborated on the energy-balance closure in Sect. 2.2 (see our reply to your comment on line 127). In the discussion, we moved the paragraph from L349-356 to this location and adapted the paragraph more towards energy-balance closure:**

*However, application of the EBM is not trivial in general, let alone over complex terrain, such as cities or forests. Typically, the observed energy balance does not close (Mauder et al., 2020), which is also the case for our field site (Kroon, 2004). For cities the addition of the anthropogenic heat flux as heat source for the turbulent heat fluxes (e.g., Oke et al., 2017) and the significant amount of heat storage (e.g., Sun et al., 2017) can complicate the application of the EBM (e.g., Harman and Belcher, 2006; Miao et al., 2012). These fluxes are added to the energy balance, so that the assumed energy balance for the EBM versions is not valid for every CML in cities. Moreover, the validity of the EBM also depends on the location of the CML, for example the mounting height, which affects the footprint of the CML to be on local scales, i.e., streets for cities, or more regional scales, i.e., city (or neighbourhood) scales.*

- Lines 304-306: “Moreover...estimates”. These lines are very confusing, please rephrase. **We agree that these lines are confusing. Based on your suggestions at line 238 and 259, we consistently use the abbreviations EBM-OBS and EBM-LSA for describing the two used EBMs. Due to these changes, the sentence has become:**  
*Moreover, in comparison to  $L_vE$  estimates obtained from LSA SAF data product, the EBM-OBS shows an improvement, while EBM-LSA does not show any improvement in comparison to these LSA SAF  $L_vE$  estimates.*

- Line 310: “These two”, unclear what is meant with “these two”, please add an explanation (e.g. variables/parameters?).  
**We refer here to the eliminated variables described in the preceding sentence, i.e., horizontal wind speed and roughness length. We rephrased as follows:**  
*These eliminated variables have a relatively large influence....*

- Lines 316-319. Please describe/demonstrate why this (i.e. increase in  $LE$  and reduction of  $H$  due to free convection assumption) occurs instead of saying that this occurs.  
**We agree that it is also important to describe why this increase in  $L_vE$  occurs, while  $H$  decreases. We added as follows:**  
*However, it must be noted that for the EBM versions, the use of free-convection causes an increase in the  $L_vE$  estimates and a reduction in  $H$  in comparison to the complete scaling.  $H$  reduces due to the strong relation with the free-convection wind scaling variable  $u_{fc}$  (Eq. 12), which decreases compared to the friction velocity  $u_*$ , so that  $L_vE$  has to increase as a consequence of the prescribed available energy that needs to be distributed among the two turbulent heat fluxes.*

- Line 323: “The former”; unclear what is meant with “The former”, please explain.  
**We mean the bichromatic method. We changed as follows:**

The *bichromatic method* is not applicable to the Nokia CML...

- Line 346: please remove “so that Cnn estimates....et.al. 2015b).”  
**We followed the suggestion of the reviewer.**
- Line 350: “shows” should be replaced by “show”  
**We changed accordingly.**
- Lines 349-356: Indeed as mentioned also previously w.r.t. line 127; the energy balance or closure does not hold everywhere, in fact almost nowhere, and especially not over complex terrain (cities and forests). Agani, this is more a discussion on the energy balance approach than on the proper functioning of CMLs for LE estimates. It would be nice/better if the discussion section would focus more on the CML method itself.  
**We moved and rearranged this paragraph to (now) Sect. 5.1, where we use it to discuss the energy-balance closure problem. See our reply to your comments on line 293-294.**
- Lines 361-364: Not clear what is meant with this section, please add clarification, or remove.  
**We agree with the reviewer that this is not clear and also does not add much to the discussion. Therefore, we removed it accordingly.**
- Lines 370-371: Performance is roughly comparable to the reference; this is not true, see also remarks made w.r.t. lines 277-278.  
**Similar to your previous comment, we meant to refer here to the performance of the free-convection method, which we did not specify. We changed as follows:**  
*Using the two-wavelength method, the performance of the turbulent heat flux estimates obtained **with the free-convection scaling and spectral noise correction method** is comparable to the comparison between the reference MWS-2 $\lambda$  method and EC system, **while application of the two-wavelength method combined with the complete scaling performs less well.***
- Lines 380-382: “Yet, for ... of the CML”: It is unclear why this statement would illustrate the added value of the CML. Please explain.  
**We agree with the reviewer that this is unclear. Moreover, after reconsideration we think that this does not add much to the story, therefore we removed this sentence.**
- Line 397: “In general, ...scintillometers” In fact this was already illustrated in the Van der Valk et.al. 2025 paper. To my opinion, in the current paper it is illustrated that operational scintillometry for LE estimates is not (yet?) possible with CMLs with a sufficient accuracy and that attempts to increase the accuracy are either hampered by inaccurate restriction/limitation determination or result in deteriorating sensible heat flux estimates. This in itself is a useful story to tell, though maybe less satisfying.  
**We agree with the reviewer that this is also a main message of our research, which is currently not well enough reflected in the conclusions. We changed this paragraph as follows:**  
*In general, our results illustrate the possibility to use CMLs as scintillometers. Also after aggregation of the 30-min  $L_vE$  estimates to daily  $E$  estimates, the performance remains comparable for almost all methods and days. This aggregation might be particularly*



*interesting for hydrological applications, for example on spatial scales of catchments, which could be combined with the possibility to monitor rainfall using the same CMLs. However, our results also illustrate that the accuracy of the L<sub>v</sub>E estimates using CML networks will largely depend on the quality of the radiation estimates. The quality of widely available radiation data, such as LSA SAF, seems too low for our purposes, and needs to be addressed in future research. Additionally, attempts to estimate evaporation using different CML types and employed sampling strategies of networks would be required, while also the performance of the proposed methods and scalings need to be tested in different climatic settings. If these issues would be addressed, CMLs could show a large potential to be used to estimate evaporation, especially considering the existing infrastructure which is also present on locations where other observations are lacking.*
